# Supplementary material
Source: PubMed Central journal article supplement (PMC3297710)
Supplement: NIHMS345804-supplement-2.pdf [file NIHMS345804-supplement-2.pdf]

# Supplementary Figure 1

mPiezo1 : EPHVFLGAGLYWLLLECTFLAASLLRNALSLVTLFLLLLMLPGSPRHSIPCHTGRLLRALCLSLLEFVALAFQCLHTVPHLDQFLGQNGSLWV : 99  
mPiezo2 : ASEVVCGLIFRLLLIICLAVACAFRYNGLSFVYIYLLLIILFSEPTKATMOCHTGRLLQSCTLSLSEFLLLIIFHTLASLEAQHRTTPAYNCSTWE : 100  
dPiezo : VFSYACMVLQRIVVAVLVLAALRPVGISFVYILMFFVSFVPLATRRNFKS VTAFFIITLTLSTLVVLGTTLQILAVSLT-----LPTYNCSFSE : 95

mPiezo1 : KVSQHTGVTRLDLKDIFNTTRLVAIDLGVLLASLCLGLCGRLTRKAGQSRRTQELQDDDDDDDDDEDIDAAP-----AVGLKGAPALATKRRL : 189  
mPiezo2 : KTRFQIGFESLKGADAGNIRVFDIIGMFIASLTINLVCRITVVKPDTTEIAQLNSECENEELAGGKMDSEALIYEEDLDGEEGMEGELEESTKLKI : 200  
dPiezo : RLLRHIGFVSFDLQFPFAIIEWLVLEVLVFATSLGSLYLVKRVASQVFGAEQLENQVVDGQAEANAQTSQPSAADANGGDVQOATVTTPLQQQQQLRK : 195

mPiezo1 : W-----IASRFRVTAHWLLMSTGRTLVIVLALAGIAHPSAFSSIMLVVFAICMWSCHFPPLSPGENTFCVMVSCFGAGLILCLYCVOTPFIDMLPP : 284  
mPiezo2 : LRRFASVASKLKEFFIGNMITTAGKVVTIILGSSGMPLSLTSAVFFVFLGLCMTWSWCRTEFDPLIGGICVLLAIFTAGLILGLYLQVQFFQEA VPP : 300  
dPiezo : R-----VSMISQIHIEFGLVKISPLFCLATFFAAVLRPSVGGGFLLEILSGMVAATCQTLQRGHALLLRCVMVVLVLSLSIVSOTPFMWSHLNH : 289

mPiezo1 : GNIFARLECLKNEVDLPNYSNPALVLTAKHAWPIYVSGIILLIYATATSLKHLKSCPSSELRKETPREDE---EHELELDHLEPEPQARDATQG--- : 377  
mPiezo2 : NDYARLEFCIKSVIQT-DCASTWKIIVPDLISWYHHAQLLLVMVYTLATLIRIWLQEP-LVQEMAKEDEGALDCSSNQTAERRRSLWYATQYPTDE : 398  
dPiezo : TITLARIITCLEPIESYCSPIRIVFLYINKLSLDSYLNFAFFAFALAITTKHLIKPRLVRQSTRKARTPOLESQSSVAPSVTQR----- : 377

mPiezo1 : --EMPMTTEPDLNCTVHVLTQSQSPVRQRPVPRVIAELK-----EMSPHLGHLMD : 428  
mPiezo2 : RKLLSMTQDDYKPSDGLLVTVNGPNVDYHTIHPSTPIENGPACTDYTTPOYRWEPEEESSEKKEEEDKRESEGEQSEKRSVRMHAMVAVFQFMK : 498  
dPiezo : -----GNDNQLESMEQRSEQENTTTIINDQIS-----YGFVSVGGFIYQ : 416

mPiezo1 : QSYVICALAMVWSLTYHWSLTFVLLWACLITVRSRHLALMLCSPCILLVGLTCCCLRVVWAMEPELPTTLGPVSL-----HQLGLEHTRYPC : 520  
mPiezo2 : QSYVICALAMVWSLTYHWSLTFVLLIWSCTLMTNRNRKYAMISPPFMVYANLVLVLOIIVSFEPEIKKVPGFLEK-----KEPG----- : 581  
dPiezo : NSYIFTNITMVAWSIYHWSLTFVLLSANVLTMTNQRKAMRSPFVIVAEALIAQMIYGMDDNNEELPTSVP TAGINLQOIGFERPIENQMRPCV : 516

mPiezo1 : DYGAMLLYLLTFLLLRQFVKKLLKKQKVPAALEVTVADT-----EPTQT-----QTLLRSLG : 575  
mPiezo2 : EYASKLFTTITFLLLRQHLTEQKALREKE-ALLSEVKIGSQLEEKDEDELQDVQVEGEPTEKEEEEEEEIKERHEVKEEEEEVEEDDDQIMKVLG : 680  
dPiezo : PUIVKTAFVLMVTSRQFFKQRDRRRDSTLADFIAPLQITVSGAGSSYLINDGKKT-----SKFLKKA : 582

mPiezo1 : ELVTGIYKYNIYVCAGMFIIVVSFAER-LVVYKIVYVLEFLCLCLTFVYYTLRLLRVSNLWVAVMVLVAVVTFQODPTYRNLTGFTDEQLG : 674  
mPiezo2 : NLVVALFIKYNIVCGGMFFVVSFECK-IVMYKIVYVLEFLCVVALYVHYEYWRKILKYSMSVVIWDLVLEFIVTYQENPGLQNTGLKKEKLE : 779  
dPiezo : DVIKNLLVRLNWLVLVIFLCAITCENMTGFRVYALEFPELLVFSSSKAVIMYGMDFLFIYASITLITTYQDKDQTYSDYLVNSATLQK : 682

mPiezo1 : DLGFEQFSVSESSILLIGFLLACILQLHYEIRPQMLTDLEHVP-----PPGTR-----HPRWAHRQD : 735  
mPiezo2 : DLGKQFTVABEITRIFPTSFLLVCLLHDFHDFDRLELTDLKSIPSKEDNTIYSHAKVNGRVYLIINRLAHPEGSLPDLAIMNMTASLDKPEVQKLA : 879  
dPiezo : DLGKRYQTKDLHLVSPITIVILTIVQHYFKRGLIASLQQOPLAG-----GSAQKQKTE : 739

mPiezo1 : AVSEA--LLEHQEEEVFREDGQMDGPHQATQVPDGTAS---KNGVADRLLDLAASFSAVLTRIQVFRRLLELVEFLALYTVVWALKEVSMN : 829  
mPiezo2 : SGEEREEECVKKTEKGEAGKSDSEEEEDDEEESSESSDLRNKWHVIDRLTVLFLKELEYFHKLVQFMWVLELHITITISSYIIWVTVKVSLFN : 979  
dPiezo : TTALEAPSKRRRSAGSLRKSQSPAEAAPGATTDFTSVR-----DLYRISFRKIKNKSEYIFKNEKDVFRWRELEHIMAYYIAAFVCSVSECVLH : 833

mPiezo1 : LLLVVLWAFALP-YPRFRPMASCLSTVVTCTIIVCKMLYOLKIVNPHEYSNTEPFPPNNTLQPLEINQSLLYRGPVDPANWFGVRRKGYPNLGYIQNHL : 928  
mPiezo2 : YVFLISWAFALP-YAKLRRASVCTVVTCTIIVCKMLYOLQTKIPENFSVNSLPEENQNTIPLHELKSLLYSAPVDPTEWGLRKSPLLVYLRNHL : 1078  
dPiezo : IIFVFGCVLGATSRKAVQVVISRLISFIVTVLVSQIYQIEYLSHSQHNVVSD-NRTANNAEWIGLTKADKVTG-----GLMSLLRTYI : 918

mPiezo1 : QILLLLVFEAVVYRREHYRQH-QQAPLPAQAVCADGTQRLLDQDILSCLKVFIFEFYKFCLEICFIMANVIGOMNFMVILHGCIVAVITRRERE : 1027  
mPiezo2 : LMLAALAEFVYRHHQYRGRN-NLTAPVSTIIFHDITRLHLDGGLINCAKVFVYEFYKFCLEICFIMSNVIGOMDFYAMIHACILGVYRNRK : 1177  
dPiezo : IYMVIVTMHAVISLRLOMVKI GALNAPPTKLLFPNITRADAEKLVGLVKKLLFGFYKFCLEISLIALSTIYQDIAVAVVYALNVLVLLRRLS : 1017

mPiezo1 : AIFRLPNYCLLETLLELYQYLLCLQDPEALCIDYPRWSKAI PMNSALIKLYLDFFRAPNSTNISDELLLCASQWQVSAERTEEWORMAGINT : 1127  
mPiezo2 : AIFEVPKYCCCLACLIITQYFVCLIDPEAPORDYPRFKGAY-FNDNLIKLYEFDIVRPNPVFVYDEMLLCASLQRIEENKAAVRIMAGNV : 1276  
dPiezo : QCAKIGVQAFSAISILTIQIVLVLPSSCLVEPPDEGPFG---EGIQRFAMLGALHFNHPKLIFFIVLILNRKSIICLQRYASNDYPPGGS : 1114

mPiezo1 : DHLEPLRGE-----PNPIPNTHCR-SLLMLAVAVRYFLVLDVVVAVAGATRISIFGLCTLACVYLLFPTLLQKDTRAQLVLDCHILLYNVT : 1219  
mPiezo2 : EICMNLDAASF---SOHNPVDSIHR-SLLMSVLIIFSLFVFTIIEITTRISIFCMGYLVACVYPLFGDLLLLKPKSILRYDNIYAYNVF : 1372  
dPiezo : NRSVIADIAQLGRVPDNPTHDCSYIRNSLILKNGVLCGFYFTAVVLAETNIADLLAYLIGAFIFLWQSDFYLRPHITIFRKLAFNVA : 1214

mPiezo1 : VVISNMLSLLSVFVEQMSNFCVIQLFSLVCIKVGYYDPKEMMTRDRCLLE-----VEEAGIINDSICFELLORNIELSHYELVSAADKATA : 1313  
mPiezo2 : VITMNILSIGAGYIGALVRNSCLIQAFSLACTVKGYQMP-----DSDRCKLE-----SGEAGIINDSICFELLORVMSYELVVAADKASQ : 1462  
dPiezo : NULLTSFQMGALFMTQTKDCCLVHMLGITCISNVLTQIQLPEEAELALKGECPKITHQVVLLWDTICFARITFQILKSHYECIITTRKANN : 1314

mPiezo1 : LQASRCFALYNAANLISINFHRQIEKSLAQKQKRRRAKQRYRQSQ-----ASRQQLQSKDPQDPSQEPGDPSPGSSPP---RRQWRPWLDFATV : 1406  
mPiezo2 : ILASRCALFQATIVAVKARIEEKKSMDQLKQDRIKARQKYGKGERMLSITQESGEGQDIQKVSEEDDERADKQKAKGKKQWRPVDWASM : 1562  
dPiezo : ILASRCADILIESLRHQIAHRHDHAKVHLKIKKRRRATQK-----MLRPLDKQTHFDEHGYPLPAPTVRRRKIEKLEPHA : 1394

mPiezo1 : IHSQVFLFSDSEEEFE--ALPDRPAAQ--SAFQMAVAVNAQTVLQRORR---ARQERAQLASGGDLNPDVEPVDVPE--EDEMAGRSHMMQ : 1496  
mPiezo2 : VRSQVYLFSDSEEEFEELKQDEEPPRK--SAFOFVYAWLIDPKTALRQRKREKKLAREEQKRRKSGDGPVWEDREDEPVKKSQDGNIIK : 1660  
dPiezo : TRASQVYMFEMDKFEDLIDHIDFLEEENITESEMRKRRKLYDKSKDAPTGFPPSTSGKISKQDAATASSASAPATRDVGLPVI PPPSTGLG : 1494

```

mPiezo1 : RVLSTMQFLNVLGQATVGLTRWLRFTKHHRTMSDVLCAEYRLLQELLRVGVEVR-RGVLDQLYVG-----EDEATLSG-----PV : 1572
mPiezo2 : RIFNILKFTWVLFVATVDSFTWLNSISREHIDISTVLRIRCMCLREIKKGNVPT-RESIHMYQNHHMNLRSGLDTIDEHSGAGSRAQAHRMDSL : 1759
dPiezo : REQTSKETS DSKSKMEVDSGEVTAKSDDEDFTNPILRLDGLVLTIRLNRFSRNYRFVNRILAGEKTKLKESSSLNRLGLSAAAMFHLKSNLESD : 1594

mPiezo1 : ETRDGP-----TASSGLGAE-----LSMDDTSSPLSTG-----YNTRSGSEEIVTDAGDLQAGTSLHGSQEL : 1634
mPiezo2 : DSRDSISCSCTEATLLISROSTLDDLDGDDVPKTSERARPRLRKMFSLDMSSSSADSGSVASSEPTQCTMLYSRQGTTEIEEVEAEAEVEVLEPE : 1859
dPiezo : ESEPPASSSTPRR----VVIAPPNATEHSD-----TSTTLTNTNTTTTPLSPPELQPLQPNITSTPQQOQHIRAAEETIELVDT : 1672

mPiezo1 : LANAR-----TRMRTASELLDRRL : 1654
mPiezo2 : LHDAAEKEYAAEYAGVEEISLTPDEELPQFSTDDCEAPPSYKAVSFEHLSFASQDSDGAKNHMVSPDSDRTDKLESSILPPLTHELTASDMLLSKMF : 1959
dPiezo : VDGVA-----HRKQCSINSSPPAKGA : 1692

mPiezo1 : HIPELEAERFEAQGRTRLRLRAGYQCVAFHSELLCYFIIILNHMVTAASAIVLEVLVFLVAMTIPRESKRFFMTAVFLEVMVVTLYLQEGFFPW : 1754
mPiezo2 : HDDELESSEKFXVDQPRFLLLFYAMNTLVRSMEVCFVILILNHMFSASITITLLELILIFLITAMSVPRSRREMMATVYVEVAIVVYFQEGFFPW : 2059
dPiezo : GEFNLEENFAQRDHHIIVEVLISWYALLNTDLCIVVVFIVQVNASLISPLELHVVEITGTSLPRETKTEFVTLIAYVQAVLITLCIQEKLWIS : 1792

mPiezo1 : NSYVLRRYENKCYFPPRLGPKTDSYIKYDVOIMAEFHSQQLCYGLDHEEDRYPKDHCSSVKDREAKEEPEAKLEQSETGTGHPKEPVLAGT : 1854
mPiezo2 : N--KDEIYKERBYEPNLIQVKKKGVLDYDIIQDLAEFHSSTDKCHGLDDEDDIVDSNTDKESDDELSLDQGRGSDSLKSNLAASVESVHTVF : 2157
dPiezo : N---YQLPNEQLLFAKFCVONKAHAIYDIIQLVLELHRYLQKSGELKSG--YKDTDNQFTKPTASIDERDSDNLQOPDSRQLN----- : 1876

mPiezo1 : PRDHIQKGSIRSKDVIQDPPDLKPRHTRHISIRFRRKETPGKGTAVMTEHEEGEKETTERKRPRHTQEKSKFERMKAAGRRLQSFVSLAQSF : 1954
mPiezo2 : P---EQPAAIRRRKSCSSSQISPRSSFSSNRKSGTSTRNSQKGSVLSLKQK-----SKRELIMEKLOEHLIKAKAFTIKTKLQI : 2237
dPiezo : -----DDAAQKLSLQVSQASLPGSEPKGTGINQLERTKYTSS----- : 1914

mPiezo1 : YQPLQRFHDIILTKYRAADVYALMELADIVDIIILLEGVAFCKHSAAT--IASSDSDQVQAFLELLEVQEGTMVDRALYLRKTVLGLAQQV : 2052
mPiezo2 : YVPIRQFEYDLIHPDYSADVYVLMELADIVDFILLVEGVAFCVHSAAD--ITSSSEDQVGGPELVVLELQEGTMVDRALYLRKTVLGLVQVI : 2335
dPiezo : ---LYKFEFSLVSKSR-LADVYALMELCPVNEFVLEGETAFCTQTESLEGVQTYAENKVPPELLELVQELLYVDRALYLRKLVNKLIIHFF : 2010

mPiezo1 : LVVALHIIMFFILAVTERMSQNAVAQLWVFKCIYFALSAYQRCGYETRILGNELTKYNHLLFLQGFRLVPELVLEAVMDRVTDTLSSLN : 2152
mPiezo2 : LVFGLHIMFFILGVTERRKSNLVAQLWVFKCVYFGLSAYQRCGYETRILGNELTKSNYVNLFLQGFRLVPELVLEAVMDRVTDTLSSLN : 2435
dPiezo : SVLGLHIMFFVAVTERMNSLAPPILFVILKCVMLLSYQKSKGYKRIILGNELTKGFMVMIARVYVQIPPELVLELITLDWVCISSMTIFD : 2110

mPiezo1 : MCVEDIYANFIIKSTETPKKYQPKGOKKIKIVYGGGLILFLIAILFPILEMSITRSVVQVYQIDVTVTLKLGVELEFMSAQQPSIVPPT : 2252
mPiezo2 : ICVEDIYAHFIIKSTETPKRYQPRGOKKAVYGGGLIVLLICIVFPILEMSITKVAQVYQILDVTVTLKLGVELEFMSAQQSQLKVM : 2535
dPiezo : LKMEDIYSNLYILRTQSTDFAMRAQKASLALTMGGTIVLLIVICIVGPICLFAGN-AVQTSVVFHVSLSIRIPIIDIIYTNN-YDSIFEIN : 2208

mPiezo1 : PQAEEELSQQFDPYPLMQEISQSPEDIVTAQIESSGAHTRISPE SRAQKQELYNGTADITLRETWNFQDLAKGGTVYTNKHTLELAPNSTARR : 2352
mPiezo2 : NSKNEFLKSGFPGNSGMOLENEREVTVAELEGNNSHWISPE SKQKMIQELTDPNSCFVVSWSIQNMELGAKALATDKLSFPVAVAT--RN : 2633
dPiezo : PEMSQMTNAYIKEKOLTIAGDATVAAVRLACNSPSTINAPEDRQRLINDRN-NHTLKARISYSLTKAPAKGLKRVNGDEHAISDESFEGLA : 2307

mPiezo1 : QLAQLEGRPDQS-----VPHLEPKYIRAPNGPEANPVKQIQPDEEDYLGVRLQLRQEQVGTGASGEQAGTKASDFLEWVIEL : 2434
mPiezo2 : SIAKMIAGNDTESSNTP-----VTHEKIYBYVVKAPSDSNKPIKQLLS--ENNFMNITLILFDNVTKSNS-----EWWWLNL : 2705
dPiezo : ALIHLSETHDVEPIHNGTNGTTPVEEVVVPGMTPKFIKVLNSGDAAVVSVSP-KHYDYRPLVKMHQDNETNGLWWEIRDYCN---DTFFNET : 2402

mPiezo1 : QDCKADCN---LLPMVITSDKVSPSLGTAGYGVGLYVSIIVLVGKVRGPFSEISHSIMFELCVDRIIKLQODIPLVRETRLELEEDYAKLIE : 2531
mPiezo2 : TGSRIFNQGSQALELVVNDKVSPSLGTAGYGVGLYASVIVLVGKVRGPFSGISHSIMFELPNVDRIIKLQODIPLVRETRLELEEDYAKLIE : 2805
dPiezo : LSKFAYSNCTSGIVMYTNDKVFSTFSITAGSILGLYITPVLASRDKSKSIGGQNRKIMFEDLBYVDRVQLCLDIYVREALEFALEEDIFAKLIE : 2502

mPiezo1 : LYRSPETIKWTRERE----- : 2547
mPiezo2 : LYRSPETIKWTRKTN----- : 2822
dPiezo : LYRSPETIKWTRKPEEYVDDGDTSIPSRMSVRRPEQLQPQQPQ : 2548

```

## Supplementary Figure 1. Conservation between mouse and drosophila Piezos.

Alignment of mpiezo1, mpiezo2 and dpiezo proteins. Conserved identical residues are highlighted in gray. dpiezo is 24% identical to both mpiezo1 and mpiezo2. Alignment was done with ClustalW and further analyzed using Genedoc program.

## Supplementary Figure 2

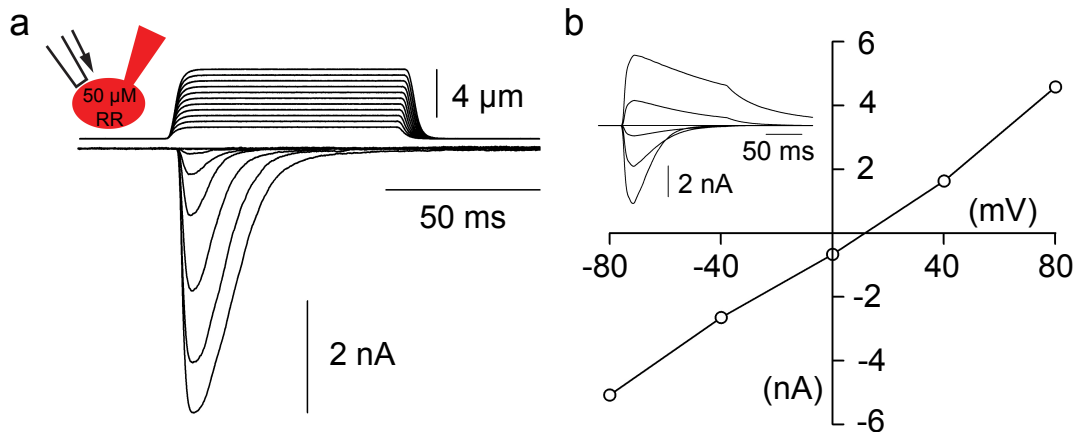

### Supplementary Figure 2. Cytoplasmically applied RR does not affect mpiezo1 induced MA currents.

(a) Representative traces of whole cell MA inward currents in mpiezo1-transfected HEK293T cells at a holding potential of -80 mV. 50  $\mu$ M RR is included in the recording electrode. (b) Current-voltage relationship of MA currents expressed in mpiezo1-transfected HEK293T cells when 50  $\mu$ M RR is included in the recording electrode. (Inset) MA currents evoked at holding potentials ranging from -80 to +80 mV. Cells were perfused for at least 5 minutes prior to recordings.

### Supplementary Figure 3

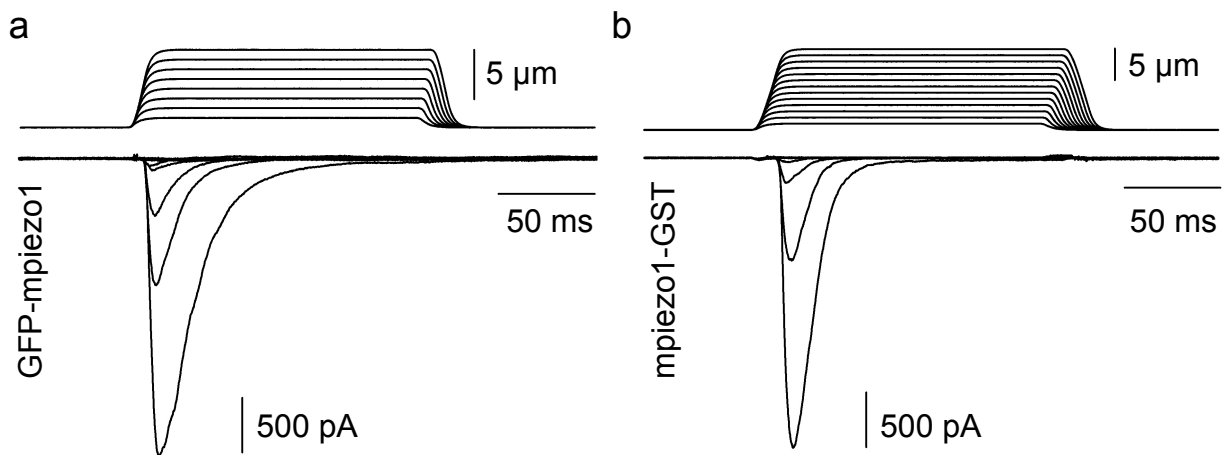

**Supplementary Figure 3. GFP-mpiezo1 and mpiezo1-GST overexpression induce MA currents in HEK293T cells.**

Representative traces of MA inward currents in GFP-mpiezo1- (a) and mpiezo1-GST- (b) transfected HEK293T cells recorded at a holding potential of -80 mV.

## Supplementary Figure 4

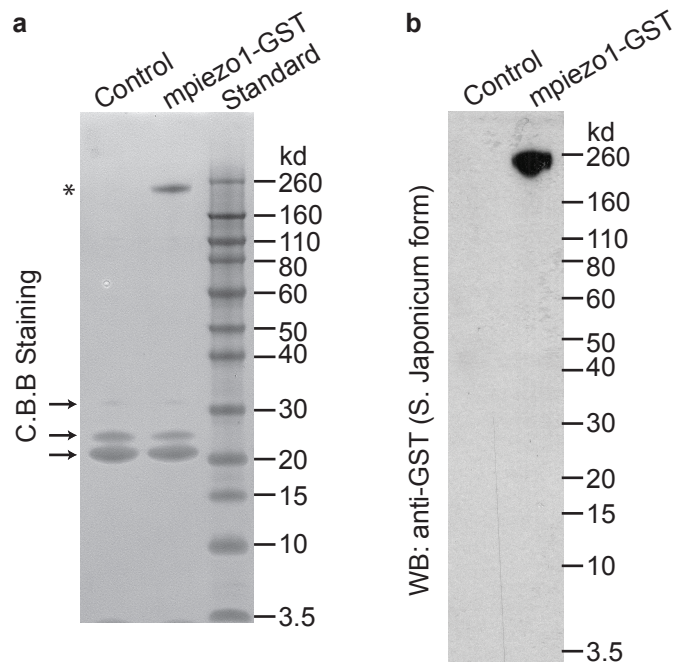

### Supplementary Figure 4. Characterization of samples purified from HEK293T cells without transfection (control) or transfected with mpiezo1-GST (mpiezo1-GST) on denaturing gel.

Control and mpiezo1-GST samples were separated on a 4-12% Bis-Tris denaturing gel and visualized with Coomassie blue staining (a) or western blotting with an anti-GST (*S. japonicum* form) antibody (b). The Novex sharp pre-stained protein standards were used for indicating the molecular weights of proteins on the gel (a). A protein band at the position of the 260 kDa protein marker specifically present in the mpiezo1-GST sample correspond to mpiezo1-GST proteins, as confirmed by western blotting with the anti-GST antibody (Supplementary Fig. 4b) or an antibody specifically against piezo1 (Fig. 4). The three lower bands indicated by arrows correspond to endogenous glutathione S-transferase pi1 (GSTP1), glutathione S-transferase mu 3 (GSTM3), and carbonyl reductase 1 (CBR1), as identified by mass spectrometry of the gel slices containing the respective bands (data not shown) or the whole purified control and mpiezo1-GST samples (Supplementary Table 2). These proteins were pulled down by the glutathione beads. It should be noted that the anti-GST (*S. japonicum* form) antibody does not recognize the endogenous human GST isoforms.

## Supplementary Figure 5

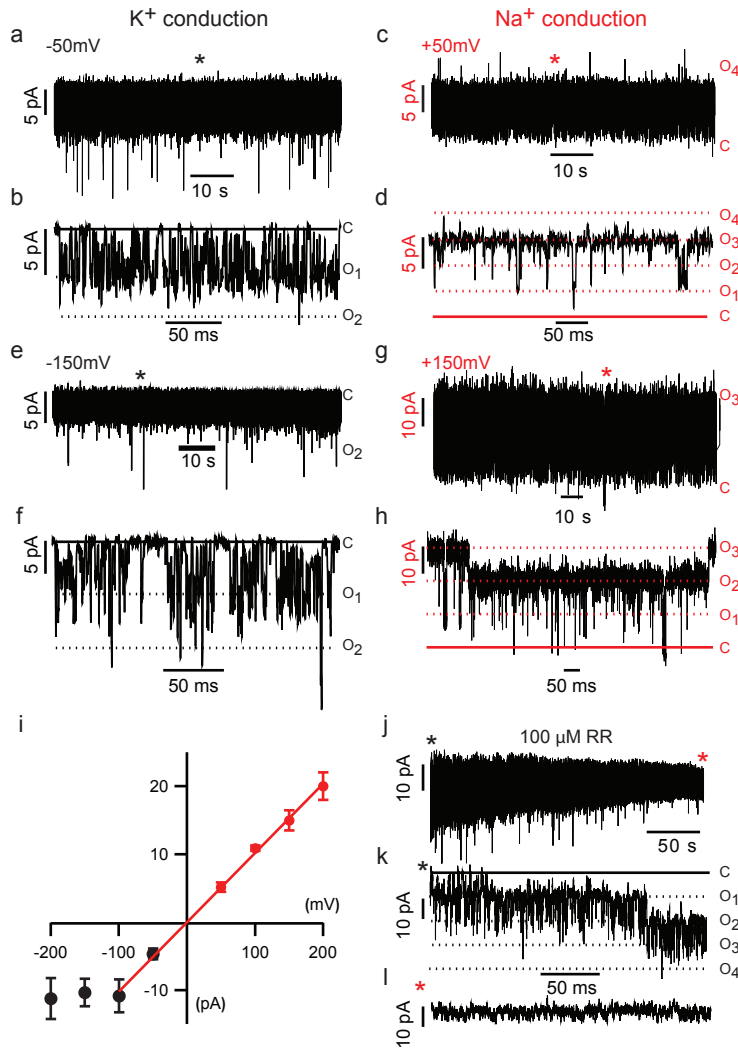

### Supplementary Figure 5. *mpiezo1* conduction under bi-ionic condition.

In the bi-ionic condition where the concentration of  $K^+$  in the cytoplasm is 200 mM and the extracellular concentration of  $Na^+$  is 200 mM, positive inward currents are carried by  $K^+$  and negative outward currents are carried by  $Na^+$ . For comparison,  $\sim 2$  min. recordings of inward (a, e) and outward (c, g) currents from a single experiment are shown at  $\pm 50$  and  $\pm 150$  mV. Segments indicated by an asterisk are displayed at higher time resolution ( $\sim 250$  to  $500$  ms) below the long recording to highlight few defined transitions between closed and open (b, f and d, h). At  $V=50$  mV and  $V=-50$  mV, the single channel inward  $K^+$  current is  $4.7 \pm 0.8$  pA ( $g=100 \pm 10$  pS) (b) and the outward  $Na^+$  current is  $5.2 \pm 0.7$  pA ( $g=90 \pm 10$  pS) (d). The currents differ in that at  $-50$  mV only 1 channel is carrying  $K^+$  current while at  $+50$  mV an average of 3 channels are passing  $Na^+$ . The inward permeation of  $K^+$  appears transient assessed from the frequent short incomplete closures (b). This contrasts to the long uninterrupted outward  $Na^+$  currents observed at  $-50$  mV. When the potential difference is increased to 150 mV ( $\pm 150$  mV) the single channel inward  $K^+$  current increases to only  $10 \pm 2$  pA ( $g=70 \pm 10$  pS) (b) whereas the outward  $Na^+$  current increases to  $15 \pm 2$  pA ( $g=100 \pm 10$  pS) (d). At  $+150$  mV, the  $Na^+$  outward flux is stable as evidenced by long open times (g, h); at  $-150$  mV, the transitions between open and closed states are faster than the time resolution of the recording and, accordingly, only a fraction of the single channel conductance is captured (e, f). This factor contributes significantly to the apparent saturation of  $K^+$  inward current. A summary of the current-voltage relation for the channel under these bi-ionic conditions extracted from 204,088 events distributed through three experiments is presented in panel i. A fit of the data with a linear function shows that the single channel current is ohmic between  $-100$  and  $200$  mV with a slope conductance of  $102 \pm 2$  pS. The current reversed direction at  $0.0 \pm 0.3$  mV indicating that the channel does not select between  $K^+$  and  $Na^+$ . To verify channel orientation, the experiment was terminated by the addition of RR ( $100 \mu M$ ) to the bath (j, k, l). After an incubation time of 5 min at a resting potential of 0 mV, the membrane was hyperpolarized to  $-150$  mV (j). A time expansion of the record at the pulse onset (k, black asterisk) shows that at least three channels were open and that these become progressively blocked. A time expansion of the record after  $\sim 4$  minutes at  $-150$  mV (l, red asterisk) indicates that the three channels are still active and that the single channel conductance has decreased to below measurable resolution.

## Supplementary Figure 6

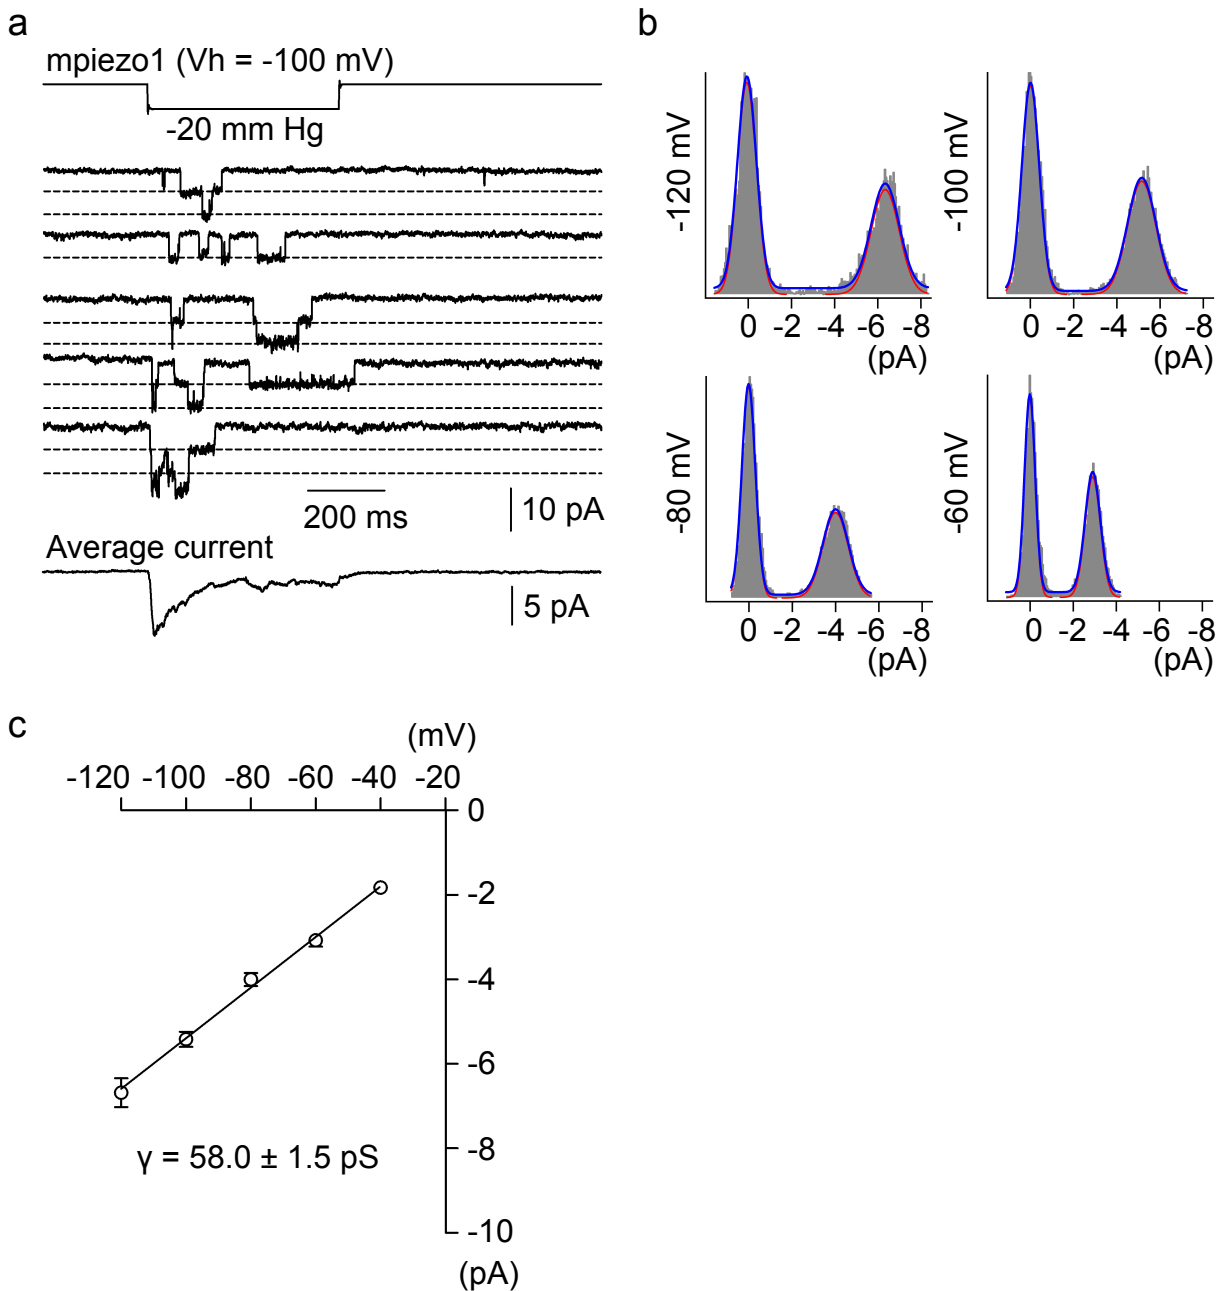

### Supplementary Figure 6. Conductance characterization of mpiezo1-induced stretch-activated channels with divalent-free pipette solution.

(a) Representative stretch-activated channel openings elicited at -100 mV in mpiezo1-transfected cells in cell-attached configuration. The recording pipette was filled with a 150 mM NaCl solution. Bottom traces represent average of 40 individual recording traces. (b) All-point histograms of single channel opening events (average of 10 individual events) at holding potentials ranging from -120 to -60 mV. (c) Average current-voltage relationships of stretch activated single channels ( $n = 7$  cells, respectively; mean  $\pm$  s.e.m.). Single channel amplitude was determined as the amplitude difference in Gaussian fits as shown in b. The slope conductance value ( $\gamma$ ) is the average of slope conductance values determined for each cell (mean  $\pm$  s.e.m.).

**Gel band containing control sample purified from either untransfected- (Exp1) or mock-transfected (Exp2) cells**

| Protein hits                                                                                                                                                              | Gene information                                                                  | Number of peptides identified in Exp 1 | Number of peptides identified in Exp 2 |
|---------------------------------------------------------------------------------------------------------------------------------------------------------------------------|-----------------------------------------------------------------------------------|----------------------------------------|----------------------------------------|
| gi 1346343 Keratin, type II cytoskeletal 1 (Cytokeratin-1) (CK-1) (Keratin-1) (K1) (67 kDa cytokeratin) (Hair alpha protein)                                              | KRT1 gene                                                                         | 6                                      | 5                                      |
| gi 28317 unnamed protein product [Homo sapiens]                                                                                                                           | Human gene for acidic (type I) cytokeratin 10                                     | 2                                      | 5                                      |
| gi 119572363 hCG22067 [Homo sapiens]                                                                                                                                      | From Homo sapiens 211000035830252 genomic scaffold, whole genome shotgun sequence | 2                                      | 1                                      |
| gi 494066 Chain A, Three-Dimensional Structure Of Class Pi Glutathione S- Transferase From Human Placenta In Complex With S- Hexylglutathione At 2.8 Angstroms Resolution | GSTP1 gene                                                                        | 2                                      | 0                                      |
| gi 37460 unnamed protein product [Homo sapiens]                                                                                                                           | pancreatic trypsinogen III                                                        | 1                                      | 1                                      |
| gi 64653281 CHRNA4 protein [Homo sapiens]                                                                                                                                 | CHRNA4                                                                            | 1                                      | 0                                      |
| gi 5032087 splicing factor 3a, subunit 1, 120kDa isoform 1 [Homo sapiens]                                                                                                 | splicing factor 3a, subunit 1, 120kDa                                             | 0                                      | 2                                      |
| gi 55956899 keratin 9 [Homo sapiens]                                                                                                                                      | KRT9 gene                                                                         | 0                                      | 1                                      |
| gi 16751921 dermcidin preproprotein [Homo sapiens]                                                                                                                        | dermcidin                                                                         | 0                                      | 1                                      |
| gi 547754 Keratin, type II cytoskeletal 2 epidermal (Cytokeratin-2e) (CK 2e) (K2e) (keratin-2)                                                                            | KRT2 gene                                                                         | 0                                      | 1                                      |

**Gel band containing samples purified from mpiezo1-GST transfected cells**

| Protein hits                                                                                                                                                              | Gene information                                                                  | Number of peptides identified in Exp 1 | Number of peptides identified in Exp 2 |
|---------------------------------------------------------------------------------------------------------------------------------------------------------------------------|-----------------------------------------------------------------------------------|----------------------------------------|----------------------------------------|
| <b>mpiezo1-GST</b>                                                                                                                                                        | <b>mPiezo1</b>                                                                    | <b>32 (14% sequence coverage)</b>      | <b>81 (31% sequence coverage)</b>      |
| gi 1510143 KIAA0233 [Homo sapiens] (human piezo1)                                                                                                                         | hPiezo1, likely detected from sequence homology with mPiezo1                      | 7                                      | 12                                     |
| gi 307086 keratin-10                                                                                                                                                      | KRT10 gene                                                                        | 2                                      | 0                                      |
| gi 386850 keratin K5                                                                                                                                                      | KRT5 gene                                                                         | 0                                      | 3                                      |
| gi 119581150 keratin 14 (epidermolysis bullosa simplex, Dowling-Meara, Koebner), isoform CRA_b [Homo sapiens]                                                             | KRT14 gene                                                                        | 0                                      | 2                                      |
| gi 6650826 PRO2044 [Homo sapiens]                                                                                                                                         | Serum albumin                                                                     | 1                                      | 0                                      |
| gi 6735452 B-ind1 protein [Homo sapiens]                                                                                                                                  | protein tyrosine phosphatase-like A domain containing 1                           | 0                                      | 1                                      |
| gi 2224907 15S-lipoxygenase [Homo sapiens]                                                                                                                                | arachidonate 15-lipoxygenase, type B                                              | 0                                      | 1                                      |
| gi 119595160 fibroblast growth factor 3 (murine mammary tumor virus integration site (v-int-2) oncogene homolog)                                                          | fibroblast growth factor 3                                                        | 0                                      | 1                                      |
| gi 1457948 APEG-1 protein                                                                                                                                                 | SPEG complex locus                                                                | 0                                      | 1                                      |
| gi 1346343 Keratin, type II cytoskeletal 1 (Cytokeratin-1) (CK-1) (Keratin-1) (K1) (67 kDa cytokeratin) (Hair alpha protein)                                              | KRT1                                                                              | 6                                      | 14                                     |
| gi 453155 keratin 9 [Homo sapiens]                                                                                                                                        | KRT9 gene                                                                         | 4                                      | 11                                     |
| gi 547754 Keratin, type II cytoskeletal 2 epidermal (Cytokeratin-2e) (CK 2e) (K2e) (keratin-2)                                                                            | KRT2 gene                                                                         | 3                                      | 7                                      |
| gi 494066 Chain A, Three-Dimensional Structure Of Class Pi Glutathione S- Transferase From Human Placenta In Complex With S- Hexylglutathione At 2.8 Angstroms Resolution | GSTP1                                                                             | 2                                      | 0                                      |
| gi 119572363 hCG22067 [Homo sapiens]                                                                                                                                      | From Homo sapiens 211000035830252 genomic scaffold, whole genome shotgun sequence | 1                                      | 1                                      |
| gi 28317 unnamed protein product [Homo sapiens]                                                                                                                           | Human gene for acidic (type I) cytokeratin 10                                     | 2                                      | 11                                     |
| gi 37460 unnamed protein product [Homo sapiens]                                                                                                                           | pancreatic trypsinogen III                                                        | 0                                      | 1                                      |

**Supplementary Table 1. Mass spectrometry results of gel band containing samples purified from either control HEK293T cells (untransfected- or mock transfected-cells) or mpiezo1-GST transfected-cells.**

Keratin proteins detected in both samples were likely derived from skin contamination during sample preparation. Among the proteins only detected in the mpiezo1-GST sample (highlighted in bold in the lower table), only piezo1 proteins were consistently identified with numerous peptides detected from two independent experiments.



| Control sample purified from untransfected HEK293T cells                                                                                                        |                                                              |                                                                          |                                                                          |
|-----------------------------------------------------------------------------------------------------------------------------------------------------------------|--------------------------------------------------------------|--------------------------------------------------------------------------|--------------------------------------------------------------------------|
| Protein Hits                                                                                                                                                    | Gene Information                                             | Number of Peptides Identified in Exp 1 (purified from whole cell lysate) | Number of Peptides Identified in Exp 2 (purified from membrane fraction) |
| gi 2554831 Chain A, Crystal Structure Of Human Glutathione S-Transferase P1- 1[v104] Complexed (9r,10r)-9-(S-Glutathionyl)-10- Hydroxy-9,10-Dihydrophenanthrene | glutathione S-transferase pi 1 (GSTP1)                       | 12                                                                       | 7                                                                        |
| gi 14250650 Glutathione S-transferase M3 (brain) [Homo sapiens]                                                                                                 | glutathione S-transferase mu 3 (brain) (GSTM3)               | 6                                                                        |                                                                          |
| gi 157929330 glutathione S-transferase M2 (muscle) [Homo sapiens]                                                                                               | glutathione S-transferase mu 2 (muscle)                      | 3                                                                        |                                                                          |
| gi 4502599 carbonyl reductase 1 [Homo sapiens]                                                                                                                  | carbonyl reductase 1 (CBR1)                                  | 1                                                                        | 1                                                                        |
| gi 10835838 Chain L, Crystal Structure Of The Fab Fragment Of The Monoclonal Antibody Mak33                                                                     |                                                              | 1                                                                        |                                                                          |
| gi 2345030 Ig kappa light chain variable region [Homo sapiens]                                                                                                  |                                                              | 1                                                                        |                                                                          |
| gi 446244 anti-GlcNAc antibody variable region:SUBUNIT=heavy chain                                                                                              |                                                              | 1                                                                        |                                                                          |
| gi 49354807 immunoglobulin E variable region [Homo sapiens]                                                                                                     |                                                              | 1                                                                        |                                                                          |
| gi 1346343 Keratin, type II cytoskeletal 1 (Cytokeratin-1) (CK-1) (Keratin-1)                                                                                   | Keratin 1                                                    |                                                                          | 3                                                                        |
| gi 453155 Keratin 9                                                                                                                                             | Keratin 9                                                    |                                                                          | 1                                                                        |
| gi 5031931 nascent polypeptide-associated complex alpha subunit isoform b [Homo sapiens]                                                                        | nascent polypeptide-associated complex alpha subunitprovided |                                                                          | 1                                                                        |

| mpiezo1-GST samples purified from mpiezo1-GST transfected HEK293T Cells                                                                                         |                                                        |                                                                          |                                                                          |
|-----------------------------------------------------------------------------------------------------------------------------------------------------------------|--------------------------------------------------------|--------------------------------------------------------------------------|--------------------------------------------------------------------------|
| Protein Hits                                                                                                                                                    | Gene Information                                       | Number of Peptides Identified in Exp 1 (purified from whole cell lysate) | Number of Peptides Identified in Exp 2 (purified from membrane fraction) |
| <b>mpiezo1-GST</b>                                                                                                                                              | <b>mpiezo1</b>                                         | <b>4 (2% sequence coverage)</b>                                          | <b>8 (4% sequence coverage)</b>                                          |
| <b>hCG1980844, isoform CRA_i [Homo sapiens]</b>                                                                                                                 | <b>hpiezo1</b>                                         |                                                                          | <b>1</b>                                                                 |
| gi 2554831 Chain A, Crystal Structure Of Human Glutathione S-Transferase P1- 1[v104] Complexed (9r,10r)-9-(S-Glutathionyl)-10- Hydroxy-9,10-Dihydrophenanthrene | Glutathione S-transferase pi (GSTP1)                   | 12                                                                       | 3                                                                        |
| gi 14250650 Glutathione S-transferase M3 (brain) [Homo sapiens]                                                                                                 | glutathione S-transferase mu 3 (brain) (GSTM3)         | 2                                                                        |                                                                          |
| gi 4502599 Carbonyl reductase 1 [Homo sapiens]                                                                                                                  | carbonyl reductase 1 (CBR1)                            | 2                                                                        |                                                                          |
| <b>gi 494186 Chain A, Crystal Structure Of Human Class Mu Glutathione Transferase Gstm2-2: Effects Of Lattice Packing On Conformational Heterogeneity</b>       | <b>glutathione S-transferase mu 2 (muscle) (GSTM2)</b> | <b>2</b>                                                                 |                                                                          |

**Supplementary Table 2. Mass spectrometry results of solution samples purified from either control untransfected HEK293T cells or mpiezo1-GST transfected cells.**

Control and mpiezo1-GST samples purified from either whole cell lysates (Experiment 1) or membrane fractions (Experiment 2). GSTP1, GSTM3, CBR1 proteins were consistently identified in both control and mpiezo1-GST samples, corresponding to the three lower protein bands present in both control and mpiezo1-GST sample (Supplementary Fig. 4a). mpiezo1-GST proteins were consistently identified only in the mpiezo1-GST sample. Reconstitution of the same set of samples used for experiment 2 into lipid bilayers resulted in recordings of channel activity with mpiezo1-GST but not control sample, suggesting that the observed channel activity is specifically mediated by mpiezo1-GST proteins.

|                                 |               |
|---------------------------------|---------------|
| <b>Conductance (pS)</b>         | 118 ± 15      |
| <b>Open Occupancy</b>           | 0.43 ± 0.14   |
| <b>Closed occupancy</b>         | 0.57 ± 0.15   |
| $\tau_{\text{open}}$ (ms)       | 13 ± 4        |
| $\tau_{1\text{closed}}$ (ms)    | 5 ± 1 (0.74)  |
| $\tau_{2\text{closed}}$ (ms)    | 47 ± 9 (0.26) |
| <b>Total number of openings</b> | 19,583        |

**Supplementary Table 3. Single channel properties of mpiezo1 in lipid bilayers.**

Single channel current recordings, in which only one channel was open at any given time, were analyzed to determine the channel dwell times in the open and closed states (references 1 and 2). Probability density analysis provides the number of open and closed states and the channel open ( $\tau_o$ ) and closed ( $\tau_c$ ) lifetimes (refs 1 and 2). Histograms were normalized to have a total area equal to one. The data summarized in the Table provide evidence for the occurrence of a single open state and two closed states under the experimental conditions (0.5 M KCl and V=-100 mV). For  $\tau_{c1}$  and  $\tau_{c2}$ , the relative area under the fitted curve is shown in brackets and represents the frequency of occurrence of each state. The results are cumulative from three different experiments; error indicates s.e.m.

1. Labarca, P., J.A. Rice, D.R. Fredkin and M. Montal. 1985. Kinetic analysis of channel gating: Application to the cholinergic receptor channel and the chloride channel from *Torpedo californica*. *Biophys. J.* 47:469-478.
2. Keller BU, Hartshorne RP, Talvenheimo JA, Catterall WA, Montal M. 1986. Sodium channels in planar lipid bilayers. Channel gating kinetics of purified sodium channels modified by batrachotoxin. *J Gen Physiol* 88: 1-23.
